# Supplementary material for: A Discussion about the Rod Position in the Splitting Tensile Tests on Hollow Concrete Blocks
Source: MDPI journal article supplement (doi:10.3390/buildings13010096), 2022-12-30
Supplement: s1 [file s1]

# A discussion about the rod position in the splitting tensile tests on hollow concrete blocks

## *Supplementary file*

## BUILDINGS

Jorge H. Chávez-Gómez <sup>1</sup>, José Álvarez-Pérez <sup>1,\*</sup>, Milena Mesa-Lavista <sup>1,\*</sup>, G. Fajardo-San-Miguel <sup>1</sup>, Diego Cavazos-de-Lira <sup>1</sup> and Ricardo González-Alcorta <sup>1</sup>

<sup>1</sup> Universidad Autónoma de Nuevo León, Facultad de Ingeniería Civil;  
jorge.chavezgm@uanl.edu.mx, mmesal@uanl.edu.mx, jose.alvarezpr@uanl.edu.mx,  
gerardo.fajardosn@uanl.edu.mx, diego.cavazosd@uanl.edu.mx,  
ricardo.gonzalezlc@uanl.edu.mx

\* Correspondence: JAP jose.alvarezpr@uanl.edu.mx; Tel.: +528145932793 (Mexico)  
MML; mmesal@uanl.edu.mx Tel.: +528132580990 (Mexico)

**Abstract:** Different loading conditions cause different tensile stress patterns in masonry structures. Several studies related to masonry behavior use indirect tensile tests to obtain that value, where the splitting test from ASTM-C-1006 is usually employed. In this paper, an experimental analysis of the tensile strength of hollow concrete blocks is reported. Different locations of the rod from the ASTM-C-1006 splitting test were analyzed. The tensile strength was evaluated in 4 different ways: 1) placing the rod in the transversal-direction over the gross area, 2) in the transversal-direction over the net area, 3) in the longitudinal-direction, and 4) 200 mm from the central region of the block in the longitudinal-direction. The obtained results were compared with the tensile strength values measured from the direct tensile test in the longitudinal-direction. In addition, an axial compressive test was performed to characterize the blocks, and a discussion about the tensile/compression ratio is shown. The experimental results from the splitting tests show that for each configuration setup, the tensile stress is different. The main result was that the splitting test over the net area with the rod positioned in the longitudinal-direction can overestimate the tensile strength more than 21% of the one over the gross area.

**Keywords:** hollow concrete blocks; tensile strength; splitting tests; masonry.

**Author Contributions:** “Conceptualization, Jorge Chávez-Gómez and José Álvarez-Pérez; Data curation, Milena Mesa-Lavista and Diego Cavazos-de-Lira; Formal analysis, José Álvarez-Pérez and G. Fajardo-San-Miguel; Funding acquisition, José Álvarez-Pérez and Ricardo González-Alcorta; Methodology, Jorge Chávez-Gómez, José Álvarez-Pérez and Milena Mesa-Lavista; Resources, Jorge Chávez-Gómez; Validation, Milena Mesa-Lavista and Diego Cavazos-de-Lira; Writing – original draft, José Álvarez-Pérez; Writing – review & editing, Milena Mesa-Lavista, G. Fajardo-San-Miguel, Diego Cavazos-de-Lira and Ricardo González-Alcorta.”

**Funding:** This research was funded by PAICYT 595-IT-2022, 496-IT-2022, and 598-IT-2022.

## Introduction

In this file it can find the direct tensile test report in the x and y direction. The blocks used for current research have a mean compressive strength of 11.62MPa. The file is structured as follow: (1) Compressive strength results, (2) Results from direct tensile test in the x and y direction.

|                                                                      |          |
|----------------------------------------------------------------------|----------|
| <b>Introduction .....</b>                                            | <b>2</b> |
| <b>1. Compressive strength results .....</b>                         | <b>3</b> |
| <b>2. Results of direct tensile test in x and y directions .....</b> | <b>4</b> |
| <b>References .....</b>                                              | <b>5</b> |

### Nomenclature

|                   |                                                                                                                        |
|-------------------|------------------------------------------------------------------------------------------------------------------------|
| $\varepsilon_u$   | Ultimate strain in compression                                                                                         |
| $\varepsilon_0$   | Strain related to the maximum stress in compression                                                                    |
| $f'_{cg}$         | HCB uniaxial compressive strength over the gross area, MPa                                                             |
| $f'_{cn}$         | HCB uniaxial compressive strength over the net area, MPa                                                               |
| $E_{cg}$          | Elastic modulus over the gross area, in compression, MPa                                                               |
| $E_{cn}$          | Elastic modulus over the net area, in compression, MPa                                                                 |
| $ft_{s_{nx}}$     | Splitting tensile strength in the x-direction over the net area, MPa                                                   |
| $ft_{s_{gx}}$     | Splitting tensile strength in the x-direction over the gross area, MPa                                                 |
| $ft_{s_y}$        | Splitting tensile strength in the y-direction, MPa                                                                     |
| $ft_{s_{y-CR}}$   | Splitting tensile strength in the y-direction, 200 mm from the central region of the block, MPa                        |
| $ft_{s_{(g-n)x}}$ | Splitting tensile strength in the x-direction over the gross area using the net area to compute the splitting strength |

## 1. Compressive strength results

30 blocks were tested to achieved its axial compressive behavior, here is the results of each one.

| <i>Specimen</i> | Max.<br>Load<br>(kN) | $(f'_{cg})$<br>(MPa) | $(f'_{cn})$<br>(MPa) | $(E_{cg})$<br>(MPa) | $(E_{cn})$<br>(MPa) | $(\varepsilon_0)$<br>(mm/mm) | $(\varepsilon_u)$<br>(mm/mm) | $\mu$ |
|-----------------|----------------------|----------------------|----------------------|---------------------|---------------------|------------------------------|------------------------------|-------|
| B1              | 380.58               | 6.69                 | 11.72                | 2998                | 5253                | 0.002190                     | 0.004627                     | 0.043 |
| B2              | 390.38               | 6.88                 | 11.96                | 3059                | 5318                | 0.002800                     | 0.005141                     | 0.077 |
| B3              | 354.33               | 6.21                 | 10.88                | 2634                | 4615                | 0.002981                     | 0.004426                     | 0.051 |
| B4              | 356.29               | 6.24                 | 10.94                | 3053                | 5357                | 0.001642                     | 0.002729                     | 0.087 |
| B5              | 335.96               | 5.85                 | 10.39                | 2500                | 4438                | 0.003652                     | 0.004783                     | 0.056 |
| B6              | 335.96               | 5.87                 | 10.37                | 3682                | 6511                | 0.001499                     | 0.002238                     | 0.061 |
| B7              | 408.61               | 7.16                 | 12.58                | 3009                | 5288                | 0.001937                     | 0.002829                     | 0.070 |
| B8              | 427.23               | 7.48                 | 13.21                | 2983                | 5264                | 0.003387                     | 0.005966                     | 0.042 |
| B9              | 379.25               | 6.64                 | 11.64                | 2652                | 4648                | 0.003028                     | 0.004851                     | 0.056 |
| B10             | 366.01               | 6.44                 | 11.26                | 2830                | 4948                | 0.002796                     | 0.004845                     | 0.052 |
| B11             | 397.77               | 6.99                 | 12.29                | 2313                | 4068                | 0.003002                     | 0.004328                     | 0.059 |
| B12             | 342.38               | 5.92                 | 10.57                | 2652                | 4733                | 0.002411                     | 0.006243                     | 0.053 |
| B13             | 408.91               | 7.17                 | 12.45                | 3283                | 5705                | 0.002657                     | 0.004849                     | 0.030 |
| B14             | 370.83               | 6.51                 | 11.32                | 2907                | 5056                | 0.003520                     | 0.005403                     | 0.065 |
| B15             | 384.10               | 6.70                 | 11.83                | 3368                | 5947                | 0.003207                     | 0.005780                     | 0.064 |
| B16             | 343.58               | 6.02                 | 10.55                | 2504                | 4388                | 0.002592                     | 0.004521                     | 0.053 |
| B17             | 392.76               | 6.91                 | 12.03                | 2969                | 5174                | 0.003406                     | 0.005012                     | 0.065 |
| B18             | 369.71               | 6.50                 | 11.38                | 2782                | 4875                | 0.003248                     | 0.004818                     | 0.058 |
| B19             | 333.22               | 5.83                 | 10.28                | 2725                | 4804                | 0.004560                     | 0.005261                     | 0.064 |
| B20             | 390.82               | 6.86                 | 12.04                | 2749                | 4828                | 0.003003                     | 0.004757                     | 0.048 |
| B21             | 393.85               | 6.89                 | 12.12                | 2780                | 4890                | 0.002743                     | 0.003390                     | 0.044 |
| B22             | 357.68               | 6.26                 | 10.98                | 2440                | 4278                | 0.002138                     | 0.005962                     | 0.071 |
| B23             | 376.01               | 6.57                 | 11.55                | 5521                | 9703                | 0.001709                     | 0.004071                     | 0.036 |
| B24             | 375.84               | 6.60                 | 11.54                | 2754                | 4811                | 0.002664                     | 0.003242                     | 0.054 |
| B25             | 385.75               | 6.81                 | 11.87                | 2219                | 3866                | 0.003158                     | 0.004812                     | 0.069 |
| B26             | 395.08               | 6.89                 | 12.20                | 2501                | 4430                | 0.002816                     | 0.003894                     | 0.083 |
| B27             | 404.94               | 7.07                 | 12.47                | 3214                | 5668                | 0.002599                     | 0.002854                     | 0.057 |
| B28             | 435.49               | 7.66                 | 13.43                | 5189                | 9096                | 0.002028                     | 0.002822                     | 0.069 |
| B29             | 374.19               | 6.55                 | 11.55                | 3653                | 6435                | 0.002290                     | 0.003405                     | 0.063 |
| B30             | 360.46               | 6.27                 | 11.09                | 3038                | 5370                | 0.002095                     | 0.003601                     | 0.045 |
| <b>Mean</b>     | 377                  | 6.61                 | 11.62                | 3032                | 5326                | 0.0027                       | 0.0044                       | 0.06  |
| <b>SD</b>       | 26.23                | 0.47                 | 0.81                 | 722                 | 1269                | 0.0007                       | 0.0011                       | 0.015 |
| <b>COV</b>      | 7%                   | 7%                   | 7%                   | 24%                 | 24%                 | 25%                          | 24%                          | 22%   |

## 2. Results of direct tensile test in x and y directions

The direct tensile tests were carried out in the x and y directions (Figure S1a,b). The plates to carried out the test have a length of 230 mm (Figure S1). The direct tests were performed under displacement control ( $0.0005 \text{ mm/s} = 0.5 \text{ }\mu\text{m/s}$ ) [1], with a different set of supporting steel plates for each direction. The description of the direct tensile test and the experimental procedure for reproducing it can be consulted in the references [2, 3]. In current research 30 blocks were tested for each direction x and y. The results are showing in Table S1.

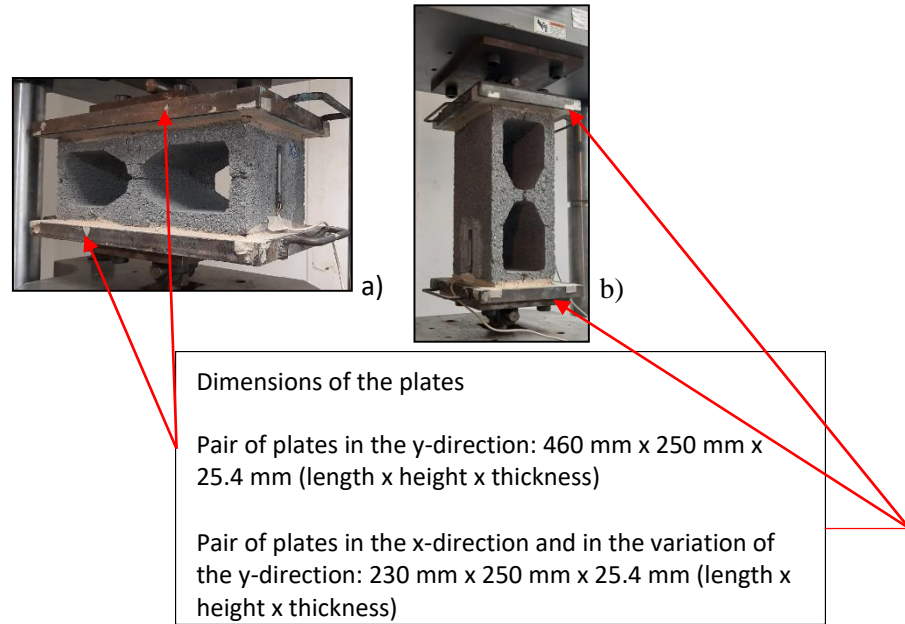

**Figure S1.** Schematic arrangement and location of the transducers for the direct tensile test in a) y direction, and b) x direction

**Table S1.** Results of the direct tensile test (the elastic modulus were evaluated using the secant modulus at 5% to 35% of the ultimate strength).

| x-direction |                 |                     |                     |                                         |                     |                     |
|-------------|-----------------|---------------------|---------------------|-----------------------------------------|---------------------|---------------------|
|             | $Ft_{D_x}$ (kN) | $ft_{D_{gx}}$ (MPa) | $ft_{D_{nx}}$ (MPa) | $\varepsilon_{tDx,U}$ ( $\mu\epsilon$ ) | $Et_{D_{gx}}$ (MPa) | $Et_{D_{nx}}$ (MPa) |
| Mean        | 8.93            | 0.316               | 0.90                | 41.20                                   | 7811                | 22187               |
| SD          | 1.31            | 0.05                | 0.13                | 10.79                                   | 2054                | 5834                |
| COV         | 15%             | 15%                 | 15%                 | 26%                                     | 26%                 | 26%                 |
| y-direction |                 |                     |                     |                                         |                     |                     |
|             | $Ft_{D_y}$ (kN) | $ft_{D_{gy}}$ (MPa) | $ft_{D_{ny}}$ (MPa) | $\varepsilon_{tDy,U}$ ( $\mu\epsilon$ ) | $Et_{D_{gy}}$ (MPa) | $Et_{D_{ny}}$ (MPa) |
| Mean        | 8.59            | 0.111               | 0.543               | 8.72                                    | 10723               | 52336               |
| SD          | 0.98            | 0.01                | 0.06                | 1.56                                    | 2452                | 11969               |
| COV         | 11%             | 11%                 | 11%                 | 18%                                     | 23%                 | 23%                 |

In Figure S2 the principal failure obtained from the direct tensile tests are shown.

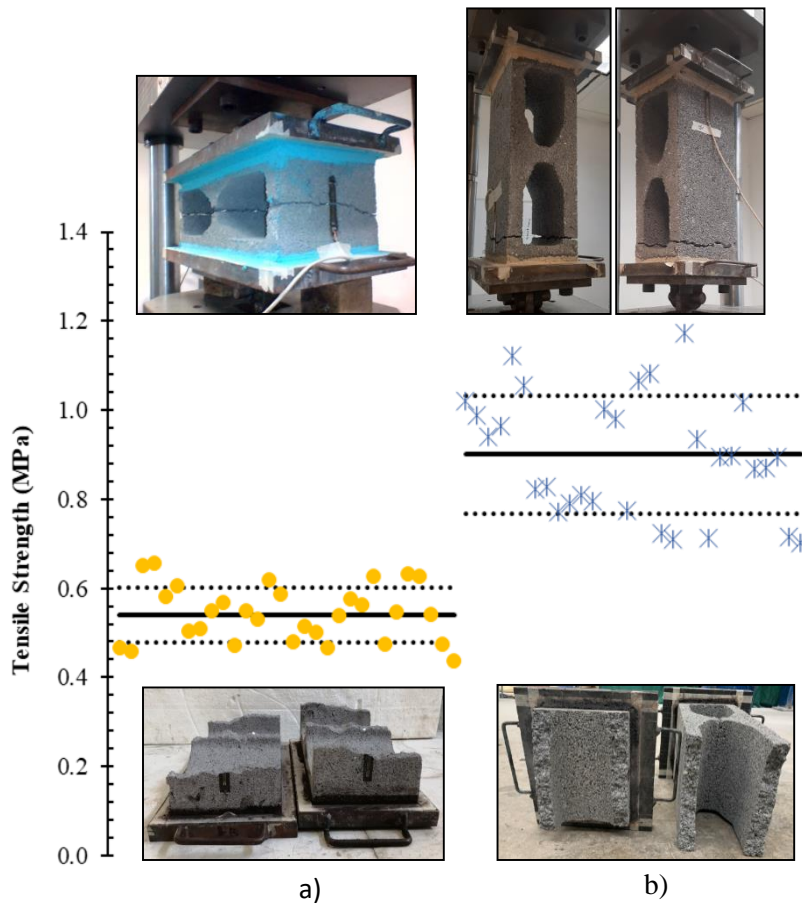

**Figure S2.** Failure mode from direct tensile tests: a) y-direction, and b) x-direction

## References

1. Almeida, J.C., P.B. Lourenço, and J.A.O. Barros, *Experimental investigation of bricks under uniaxial tensile testing*. Masonry International, 2005. **18**(1): p. 11-20
2. Álvarez, J., M. Mesa, and J.H. Chávez. *Splitting and direct tensile tests comparison in hollow concrete blocks*. in *14TH CANADIAN MASONRY SYMPOSIUM*. 2021. Digital Proceedings Montréal, Canada: Canada Masonry Design Centre.
3. Álvarez-Pérez, J., et al., *Experimental investigation on tensile strength of hollow concrete blocks* Materials and Structures, 2021. **54**(4): p. 26. <sup>^</sup><http://dx.doi.org/10.1617/s11527-021-01761-3>
